# Supplementary material
Source: Springer Nature journal article supplement (https://www.springermedizin.de/resource/supplementary/12879_2012_2942_MOESM2_ESM.pdf/9445410)

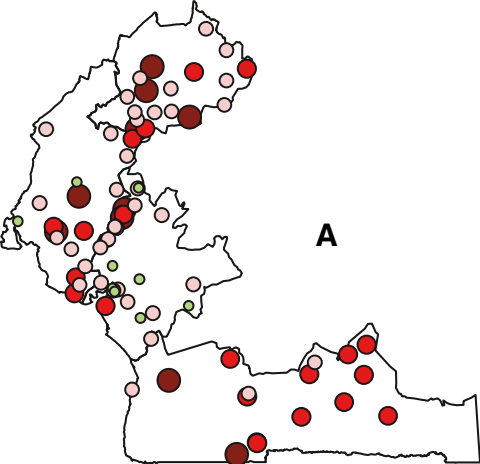

***A. lumbricoides*  
prevalence**

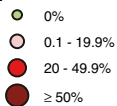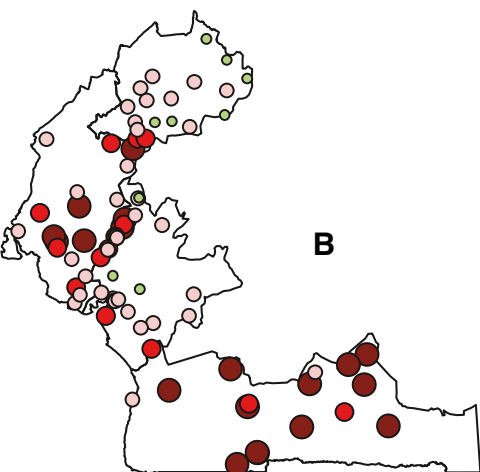

***T. trichiura*  
prevalence**

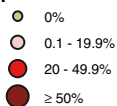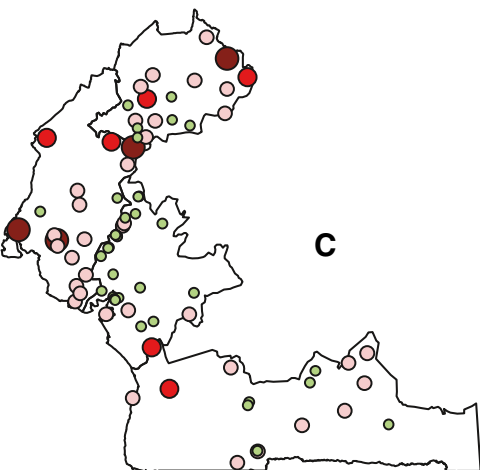

**Hookworm  
prevalence**

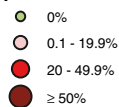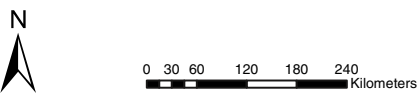

Supplement: MOESM2 [file 9445410]
